# Supplementary material for: Heat-treated foxtail millet protein delayed the development of pre-diabetes to diabetes in mice by altering gut microbiota and metabolomic profiles
Source: Royal Society of Chemistry journal article supplement (doi:10.1039/d3fo00294b), 2023-01-01
Supplement: d3fo00294b1.pdf [file d3fo00294b1.pdf]

## Supplementary information

### Heat-treated Foxtail Millet Protein Delayed the Development of Pre-diabetes to Diabetes in mice by Altering Gut Microbiota and Metabolomic Profiles

Han Wang <sup>a</sup>, Qun Shen <sup>a</sup>, Fan Zhang <sup>b</sup>, Yongxia Fu <sup>c</sup>, Yiqing Zhu <sup>a</sup>, Liangxing Zhao <sup>a</sup>, Chao  
Wang <sup>a</sup>, Qingyu Zhao <sup>a\*</sup>

<sup>a</sup> College of Food Science and Nutritional Engineering, China Agricultural University, National Center of Technology Innovation (Deep Processing of Highland Barley) in Food Industry, National Engineering Research Center for Fruit and Vegetable Processing, Beijing 100083, China

<sup>b</sup> Beijing Industrial Technology Research Institute Ltd., Beijing, China

<sup>c</sup> Shanxi Institute for Functional Food, Shanxi Agricultural University, Taiyuan, China

\*Corresponding author:

Dr. Qingyu Zhao

College of Food Science and Nutritional Engineering, China Agricultural University, No.17, East  
Qinghua Road, Haidian District, Beijing 100083, China.

E-mail: zqy565527877@163.com; Tel/Fax: +86-10-62737524.

## Supplemental Figures

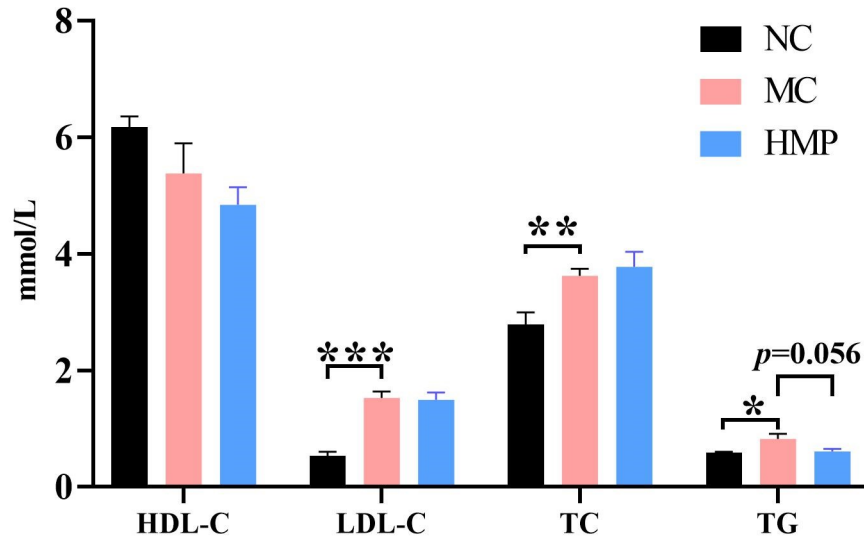

**Fig. S1.** Serum lipid measurements: high-density lipoprotein cholesterol (HDL-C), low-density lipoprotein cholesterol (LDL-C) total cholesterol (TC), and triglyceride (TG). Values were analyzed by Student's t-test and expressed as the mean  $\pm$  SEM of six mice/group. Significant correlations are marked by \* $p < 0.05$ ; \*\* $p < 0.01$ ; \*\*\* $p < 0.001$ . NC: normal control group; MC: model control group; HMP: heat-treated foxtail millet protein group.

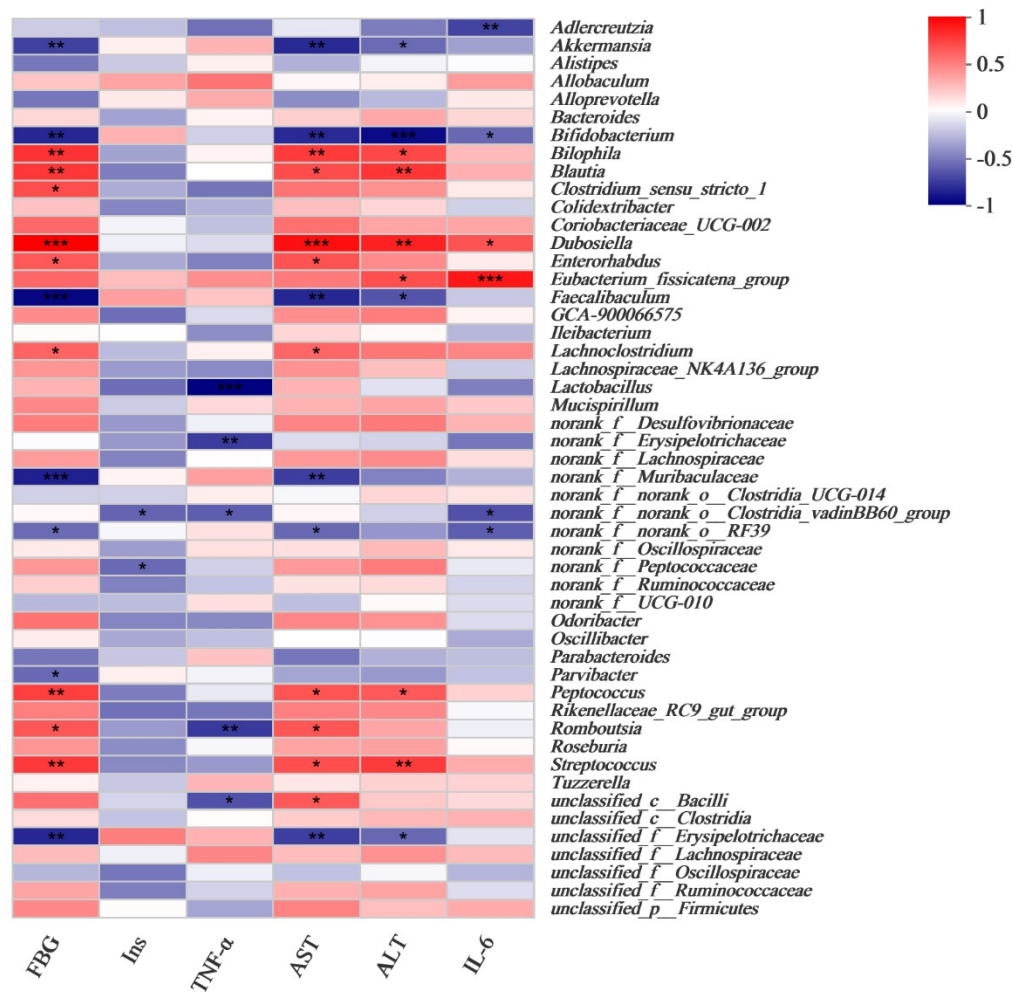

**Fig. S2.** The spearman correlation analysis of the associations of gut microbial changes with diabetes-related parameters. The r value is represented by the gradient color; red indicates a positive correlation, and blue color indicates a negative correlation. Means with different letters on the bar charts indicate significant differences.

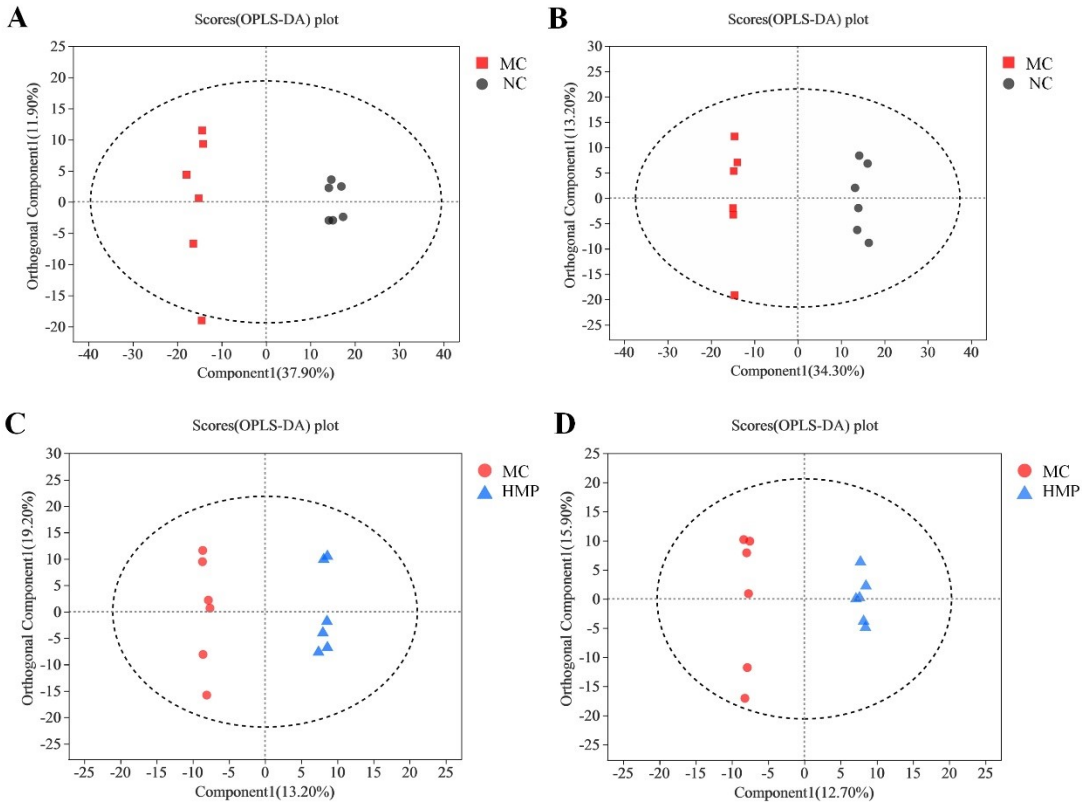

**Fig. S3.** Orthogonal partial least squares discrimination analysis (OPLS-DA) score plots of serum metabolic profiling in normal control (NC) vs. model control (MC) groups under positive-ion (A) and negative-ion (B) modes. MC vs. heat-treated foxtail millet protein (HMP) under positive-ion (C) and negative-ion (D).

## Supplementary Tables

**Tab. S1.** The composition of the experimental diet

| Ingredient (g/kg)                          | NC         | MC         | HMP           |
|--------------------------------------------|------------|------------|---------------|
| <b>Heat-treated foxtail millet protein</b> | <b>0</b>   | <b>0</b>   | <b>33.6</b>   |
| <b>Casein, 80 Mesh</b>                     | <b>200</b> | <b>200</b> | <b>176.48</b> |
| L-Cystine                                  | 3          | 3          | 3             |
| Corn starch                                | 506.2      | 0          | 0             |
| Maltodextrin 10                            | 125        | 125        | 125           |
| Sucrose                                    | 77.8       | 68.8       | 68.8          |
| Cellulose, BW200                           | 50         | 50         | 50            |
| Soybean Oil                                | 25         | 25         | 25            |
| Lard                                       | 20         | 245        | 245           |
| Mineral Mix, S10026                        | 10         | 10         | 10            |
| Dicalcium Phosphate                        | 13         | 13         | 13            |
| Calcium Carbonate                          | 5.5        | 5.5        | 5.5           |
| Potassium Citrate, 1 H <sub>2</sub> O      | 16.5       | 16.5       | 16.5          |
| Vitamin Mix, V10001                        | 1          | 10         | 10            |
| Choline Bitartrate                         | 2          | 2          | 2             |
| Source                                     | Energy %   |            |               |
| Carbohydrate                               | 70         | 20         | 20            |
| <b>Protein</b>                             | <b>20</b>  | <b>20</b>  | <b>20</b>     |
| Fat                                        | 10         | 60         | 60            |

**Tab. S2.** Amino acid composition of HMP

| Amino acid         | Content (%) |
|--------------------|-------------|
| Aspartic acid/ Asp | 4.65        |
| Threonine/ Thr     | 3.04        |
| Serine/ Ser        | 3.69        |
| Glutamic acid/ Glu | 20.93       |
| Glycine/ Gly       | 1.50        |
| Alanine/ Ala       | 8.56        |
| Valine/ Val        | 3.64        |
| Methionine/ Met    | 2.89        |
| Isoleucine/ Ile    | 3.50        |
| Leucine/ Leu       | 12.95       |
| Tyrosine/ Tyr      | 3.18        |
| Phenylalanine/ Phe | 5.08        |
| Lysine/ Lys        | 0.65        |
| Histidine/ His     | 1.41        |
| Arginine/ Arg      | 1.76        |
| Proline/ Pro       | 5.91        |
| Cysteine/ Gys      | —           |

**Tab. S3.** Secondary structure composition of HMP

| Secondary structures  | Range (cm <sup>-1</sup> ) | Numerical value (%) |
|-----------------------|---------------------------|---------------------|
| $\alpha$ -Helix       | 1650- 1660                | 22.78 $\pm$ 0.22    |
| $\beta$ -Sheet        | 1610- 1642                | 34.45 $\pm$ 0.98    |
| $\beta$ -Turn         | 1660- 1680                | 14.22 $\pm$ 0.58    |
| Random coils          | 1642- 1650                | 22.56 $\pm$ 0.01    |
| $\beta$ -Antiparallel | 1680- 1770                | 5.99 $\pm$ 0.18     |

**Tab. S4.** List of serum metabolites changed between HMP- MC and NC- MC groups

| Metabolite                                                                  | M/Z      | mode | RT     | FC (HMP/MC) | P_value  | FC (MC/NC) | P_value       |
|-----------------------------------------------------------------------------|----------|------|--------|-------------|----------|------------|---------------|
| (3b,4b,11b,14b)-11-Ethoxy-3,4-epoxy-14-hydroxy-12-cyathen-15-al 14-xyloside | 539.2906 | neg  | 6.9664 | 1.0658      | 0.01602  | 1.1887     | 0.0305        |
| (3-Nitroamino) alanine                                                      | 185.9934 | neg  | 1.0814 | 1.0241      | 0.0168   | 0.9578     | 0.003427      |
| [2-(dimethylamino)ethoxy] sulfonic acid                                     | 150.0223 | neg  | 0.8310 | 1.0253      | 0.02761  | 1.0451     | 0.000804      |
| 11,14,17-Eicosatrienoic acid                                                | 324.2897 | pos  | 6.8405 | 0.9686      | 0.02066  | 1.0415     | 0.001062      |
| 13Z-Docosenamide                                                            | 338.3418 | pos  | 6.9587 | 0.9753      | 0.009463 | 1.0500     | 0.001411      |
| 1-Pyrroline-5-carboxylic acid                                               | 131.0818 | pos  | 0.8738 | 1.0230      | 0.04955  | 1.0593     | 0.005692      |
| 20-Hydroxy-PGF2a                                                            | 371.2404 | pos  | 6.6742 | 0.9877      | 0.01773  | 1.0234     | 7.42E-05      |
| 3 alpha,7 alpha,26-Trihydroxy-5beta-cholestane                              | 465.3586 | neg  | 6.5448 | 0.9249      | 0.009468 | 1.2631     | 1.17E-07      |
| 3a,7a-Dihydroxy-5b-cholestan-26-al                                          | 463.3431 | neg  | 6.8567 | 0.9542      | 0.004015 | 1.1361     | 3.95E-06      |
| 4-Hydroxy-16,18-tritriacontanedione                                         | 553.4841 | neg  | 7.3177 | 1.0296      | 0.04464  | 1.0600     | 0.000327<br>4 |
| 4-Hydroxy-6-nonadecanone                                                    | 321.279  | pos  | 6.9448 | 0.9738      | 0.01811  | 1.0522     | 1.32E-05      |
| 4-Hydroxybenzenesulfonic acid                                               | 172.9907 | neg  | 3.3777 | 0.9057      | 0.03983  | 0.9366     | 0.01818       |
| 7a,12a-Dihydroxy-cholestene-3-one                                           | 461.3273 | neg  | 6.8226 | 0.9557      | 0.01464  | 1.1289     | 4.72E-05      |
| 7Z,10Z-Hexadecadienoic acid                                                 | 503.4108 | neg  | 7.3931 | 0.9766      | 0.03788  | 1.0511     | 0.000676<br>7 |
| Acetylbalchanolide                                                          | 310.2014 | pos  | 6.1432 | 0.9581      | 2.59E-05 | 0.9584     | 0.003195      |
| Alanyl-Lysine                                                               | 452.3221 | pos  | 6.6881 | 0.9896      | 0.0389   | 1.0210     | 0.000221      |
| Alpha-Bisabolol oxide C                                                     | 271.2269 | pos  | 6.5425 | 0.9811      | 0.03648  | 1.0414     | 0.000299      |



|                               |          |     |        |        |          |        |               |
|-------------------------------|----------|-----|--------|--------|----------|--------|---------------|
| Asperagenin                   | 487.2798 | pos | 6.7919 | 0.9903 | 0.02558  | 1.0454 | 6.12E-06      |
| Bisacurone epoxide            | 286.2013 | pos | 5.9394 | 0.9640 | 0.001034 | 0.9473 | 4.97E-05      |
| Cibacic acid                  | 357.2249 | pos | 6.6533 | 0.9901 | 0.04254  | 1.0232 | 6.03E-05      |
| Corchoroside B                | 563.2905 | neg | 6.4725 | 1.0581 | 0.003532 | 1.3227 | 0.03111       |
| DG (13:0/18:0/0:0)            | 535.4733 | neg | 7.8002 | 0.9632 | 0.006684 | 1.2972 | 4.50E-07      |
| DG (14:0/0:0/18:2n6)          | 577.484  | neg | 7.2370 | 0.9545 | 0.00202  | 1.1897 | 5.85E-08      |
| DG (14:0/15:0/0:0)            | 507.4418 | neg | 7.6051 | 0.9655 | 0.01662  | 1.2020 | 7.26E-08      |
| DG (15:0/18:0/0:0)            | 581.5152 | neg | 7.4671 | 1.1005 | 0.004818 | 1.1117 | 0.003143      |
| DG (15:0/18:3(6Z,9Z,12Z)/0:0) | 575.4682 | neg | 7.2304 | 0.9734 | 0.02542  | 1.1150 | 2.77E-06      |
| Dihydrozeatin                 | 239.1616 | pos | 6.6951 | 0.9878 | 0.00484  | 1.0238 | 4.25E-06      |
| Docosatrienoic acid           | 352.3211 | pos | 6.9378 | 0.9683 | 0.01056  | 1.0517 | 0.000195<br>2 |
| Jurubine                      | 632.3565 | neg | 6.4588 | 1.0382 | 0.01415  | 0.9492 | 0.000881<br>1 |
| LysoPC (16:1(9Z)/0:0)         | 538.3153 | neg | 6.9596 | 1.0448 | 0.03357  | 0.8825 | 2.10E-05      |
| LysoPC (18:1(9Z))             | 566.3466 | neg | 7.2304 | 1.0074 | 0.03073  | 0.9688 | 3.44E-06      |
| LysoPC (20:1(11Z))            | 594.3779 | neg | 7.7201 | 1.0859 | 0.01371  | 0.8337 | 1.57E-05      |
| Pantothenic Acid              | 220.1181 | pos | 2.9110 | 0.9845 | 0.02825  | 1.0489 | 0.000136<br>3 |
| PC (17:1(9Z)/0:0)             | 508.3408 | pos | 7.0905 | 1.0233 | 0.04594  | 0.9415 | 6.87E-05      |
| PC (18:1/0:0)                 | 522.3558 | pos | 7.2495 | 1.0057 | 0.02463  | 0.9781 | 3.86E-05      |

|                         |          |     |        |        |          |        |          |
|-------------------------|----------|-----|--------|--------|----------|--------|----------|
| PC (19:1(9Z)/0:0)       | 536.3718 | pos | 7.5768 | 1.0423 | 0.04584  | 0.8751 | 1.10E-05 |
| PC (20:1/0:0)           | 572.3693 | pos | 7.7101 | 1.0416 | 0.009109 | 0.8900 | 2.48E-06 |
| Propyl 2,4-decadienoate | 228.196  | pos | 6.5355 | 0.9891 | 0.02507  | 1.0219 | 7.14E-05 |
| Sphingosine             | 300.2899 | pos | 6.3046 | 0.9530 | 0.02797  | 1.0482 | 0.03834  |
| Squamocin L             | 605.479  | neg | 7.2170 | 0.7943 | 0.000657 | 1.4804 | 1.42E-10 |
| Tanacetol B             | 297.2035 | pos | 6.7021 | 0.9902 | 0.01639  | 1.0201 | 7.38E-05 |

---

Note: FC: fold change; RT: retention time; M/Z: mass-to-charge ratio; MC: model control group; NC: normal control group; HMP: heat-treated foxtail millet group. The student's t-test was applied to calculate the significance of metabolite intensities differences among different groups.

**Tab. S5.** Summary of the KEGG pathways influenced by HMP in mice

| Pathway Description                     | Pathway_ID | <i>P</i> -value |
|-----------------------------------------|------------|-----------------|
| Apoptosis                               | map04210   | 0.0058          |
| Sphingolipid signaling pathway          | map04071   | 0.0218          |
| Necroptosis                             | map04217   | 0.0146          |
| beta-Alanine metabolism                 | map00410   | 0.046           |
| Pantothenate and CoA biosynthesis       | map00770   | 0.0403          |
| Sphingolipid metabolism                 | map00600   | 0.0361          |
| Vitamin digestion and absorption        | map04977   | 0.0558          |
| Biosynthesis of unsaturated fatty acids | map01040   | 0.1037          |
| Primary bile acid biosynthesis          | map00120   | 0.0019          |
| Choline metabolism in cancer            | map05231   | 0.016           |
| Glycerophospholipid metabolism          | map00564   | 0.0738          |
